# Supplementary material
Source: ML conference proceedings conference paper supplement (https://proceedings.neurips.cc/paper_files/paper/2016/hash/cf1f78fe923afe05f7597da2be7a3da8-Abstract.html)
Supplement: Supplementary file [file cf1f78fe923afe05f7597da2be7a3da8-Supplemental.zip]

# Near-Isometry by Relaxation: Supplement

Anonymous Author(s)

Affiliation

Address

email

## 1 Proof of Proposition 1,3.

We first prove the following Lemma.

**Proposition 1.** *If  $f : S \subseteq \mathbb{R}^D \rightarrow \mathbb{R}$  is convex, non-negative and  $\nabla^2 f$  exists for all  $x \in \text{int } S$ , then  $\frac{1}{2}f^2(x)$  is convex.*

**Proof**  $\nabla(\frac{1}{2}f^2) = f\nabla f$ ;  $\nabla^2(\frac{1}{2}f^2) = f\nabla^2 f + \nabla f\nabla f'$  which is positive definite whenever  $f\nabla^2 f$  is.  $\square$

Using the above Lemma, and the fact that  $\|\mathbf{H}_k - \mathbf{I}_n\|$  is non-negative and infinitely differentiable almost everywhere, we obtain the desired result.  $\square$

## 2 Proof of Proposition 2

$$\|\mathbf{G}\|_{\mathbf{G}_0 + \epsilon \mathbf{I}_s} = \sup_{u \neq 0} \frac{u' \mathbf{G} u}{u' \mathbf{G}_0 u + \epsilon \|u\|^2} \quad (1)$$

$$= \sup_{u \neq 0} \frac{v' \mathbf{G}_\epsilon^{-1} \mathbf{G} \mathbf{G}_\epsilon^{-1} v}{\|v\|^2} \quad \text{with } \mathbf{G}_\epsilon = (\mathbf{G}_0 + \epsilon \mathbf{I})^{1/2} \text{ and } v = \mathbf{G}_\epsilon u \quad (2)$$

$$= \|\tilde{\mathbf{G}}\|_2 \quad \text{with } \tilde{\mathbf{G}} = (\mathbf{G}_0 + \epsilon \mathbf{I})^{-1/2} \mathbf{G} (\mathbf{G}_0 + \epsilon \mathbf{I})^{-1/2} \quad (3)$$

For (2), we first prove the following fact

$$\sup_{u \in \mathbb{R}^s} \frac{|u^T \mathbf{G} u|}{u^T \mathbf{G}_0 u + \epsilon \|u\|^2} \begin{cases} = \sup_{u \in \text{Null } \mathbf{G}^\perp} \frac{|u^T \mathbf{G} u|}{u^T \mathbf{G}_0 u + \epsilon \|u\|^2} & \text{if } \text{Null}(\mathbf{G}) = \text{Null}(\mathbf{G}_0) \\ \leq \max_{\alpha^2 + \beta^2 = 1} \frac{\beta^2 \lambda^1(\mathbf{G}) + \alpha^2 \lambda_{\max}(\mathbf{G}) + 2\alpha\beta \Theta_{\max}(\mathbf{G}, \mathbf{G}_0)}{\beta^2 \epsilon + \alpha^2 (\lambda_{\min}^*(\mathbf{G}_0) + \epsilon)} & \text{if } \text{Null}(\mathbf{G}) \neq \text{Null}(\mathbf{G}_0) \end{cases} \quad (4)$$

where  $\lambda_{\max}(\mathbf{G})$  is the spectral radius of  $\mathbf{G}$ ,  $\Theta(\mathbf{G}, \mathbf{G}_0) = \sup_{\|u\|=\|v\|=1, v \in \text{Null } \mathbf{G}, u \in \text{Null } \mathbf{G}_0} u' \mathbf{G} v$  is the cosine of the principal angle between  $\text{Null } \mathbf{G}$  and  $\text{Null } \mathbf{G}_0$ , and  $\lambda_{\min}^*(\mathbf{G}_0)$  is the smallest non-zero eigenvalue of  $\mathbf{G}_0$ .

Denote for simplicity  $g(u) = \frac{|u^T \mathbf{G} u|}{u^T \mathbf{G}_0 u + \epsilon \|u\|^2}$ . (1) If  $\text{Null}(\mathbf{G}) = \text{Null}(\mathbf{G}_0)$  then for  $u \in \text{Null } \mathbf{G}$  the value is 0, which cannot be the sup. Let  $u_1 = v \oplus u_0$  with  $u_0 \in \text{Null } \mathbf{G}$ ,  $v \in \text{Null } \mathbf{G}^\perp$ . Then  $u_1^T \mathbf{G}_0 u_1 + \epsilon \|u_1\|^2 = v^T \mathbf{G}_0 v + \epsilon \|v\|^2 + \epsilon \|u_0\|^2 > v^T \mathbf{G}_0 v + \epsilon \|v\|^2$ . Hence, the  $u$  which attains the supremum must be in  $\text{Null } \mathbf{G}$ .

Now note that, if  $\text{Null } \mathbf{G} \neq \text{Null } \mathbf{G}_0$ ,  $\mathbb{R}^s = \text{Null } \mathbf{G}_0 \oplus \text{Null } \mathbf{G}_0^\perp$ , and  $\text{Null } \mathbf{G}_0 = (\text{Null } \mathbf{G}_0 \cap \text{Null } \mathbf{G}) \oplus \mathcal{V}$ , with  $\mathcal{V}$  the orthogonal complement of  $\text{Null } \mathbf{G}_0 \cap \text{Null } \mathbf{G}$  in  $\text{Null } \mathbf{G}_0$  and the supremum of  $g(u) =$  is attained on  $\mathcal{U} = \mathcal{V} \oplus \text{Null } \mathbf{G}_0^\perp$  (as adding any component along the orthogonal complement of this space only adds a positive value to the denominator, increasing  $g(u)$ ). Any  $u \in \mathcal{U}$  can be written as  $u = \alpha u_0 \oplus \beta v_0$  with  $u_0 \in \text{Null } \mathbf{G}_0^\perp$  and  $v_0 \in \mathcal{V}$  unit vectors. By upper bounding every term in

the numerator and lower bounding  $u'_0 \mathbf{G}_0 u_0$  we obtain the result. Note that for  $\epsilon$  small enough, the expression in 4 is close to  $\frac{1}{\epsilon} \lambda^\dagger(\mathbf{G})$ .

For (2), let  $v \in \mathcal{V}$  and compute  $g(v)$  as above, with  $\alpha = 0$ . It follows that  $g(v) = \frac{|v' \mathbf{G} v|}{\epsilon \|v\|^2}$  and by taking the supremum over  $v \in \mathcal{V}$  we obtain that  $\sup_{\mathcal{V}} g(v) = \frac{1}{\epsilon} \lambda^\dagger(\mathbf{G}) < r$ , from which the result follows.

For (3), it is obvious that when  $\epsilon \rightarrow 0$ ,  $g(v) \rightarrow \infty$  on  $\mathcal{V}$ , but remains finite for  $u \notin \mathcal{V}$ . More precisely,  $\|\mathbf{G}\|_{\mathbf{G}_0} = \infty$  iff  $\text{Null } \mathbf{G}_0 \not\subseteq \mathbf{G}$ . To verify that  $\|\cdot\|_{\mathbf{G}_0}$  is a norm, we must verify the triangle inequality, since the other two properties obviously hold. If  $\|\mathbf{A}\|_{\mathbf{G}_0} = \infty$  or  $\|\mathbf{B}\|_{\mathbf{G}_0} = \infty$ , triangle inequality holds trivially. Assume then that  $\|\mathbf{A}\|_{\mathbf{G}_0}, \|\mathbf{B}\|_{\mathbf{G}_0} < \infty$ . Since  $\|\mathbf{A}\|_{\mathbf{G}_0 + \epsilon \mathbf{I}_s} + \|\mathbf{B}\|_{\mathbf{G}_0 + \epsilon \mathbf{I}_s} \geq \|\mathbf{A} + \mathbf{B}\|_{\mathbf{G}_0 + \epsilon \mathbf{I}_s}$  for every  $\epsilon > 0$ , then in the limit we will have that  $\|\mathbf{A}\|_{\mathbf{G}_0} + \|\mathbf{B}\|_{\mathbf{G}_0} \geq \|\mathbf{A} + \mathbf{B}\|_{\mathbf{G}_0}$ .

**The norm for comparing Riemannian metric** The norm of a bilinear functional  $f : \mathbb{R}^2 \times \mathbb{R}^2 \rightarrow \mathbb{R}$  is defined as  $\sup_{\|u\|=\|v\|=1} |f(u, v)|$ , or since for a fixed orthonormal base of  $\mathbb{R}^s$   $f(u, v) = u' \mathbf{A} v$ ,  $\|f\| = \sup_{\|u\|=\|v\|=1} |u' \mathbf{A} v|$ . If  $\mathbf{A}$  is hermitian, then  $\|f\| = \max_{\lambda \in \lambda(\mathbf{A})} |\lambda_i|$  where  $\lambda(\mathbf{A})$  denotes the spectrum of  $\mathbf{A}$ . One can define the norm with respect to any metric  $\mathbf{G}_0$  on  $\mathbb{R}^s$  where  $\mathbf{G}_0$  is a symmetric, positive definite matrix by  $\|f\|_{\mathbf{G}_0} = \sup_{\|u\|_{\mathbf{G}_0}=\|v\|_{\mathbf{G}_0}=1} |u' \mathbf{A} v| = \sup_{\|\tilde{u}\|=\|\tilde{v}\|=1} |\tilde{u}' \mathbf{G}_0^{-1/2} \mathbf{A} \mathbf{G}_0^{-1/2} \tilde{v}| = \max_{\lambda \in \lambda(\mathbf{G}_0^{-1/2} \mathbf{A} \mathbf{G}_0^{-1/2})} |\lambda_i|$ . In other words, the appropriate operator norm we seek can be expressed as a (generalized) matrix spectral norm. In our cases  $\mathbf{G}_0 = \mathbf{I}_d$  and  $\mathbf{A} = \mathbf{H}_k - \mathbf{I}_d$ .

### 3 Proof of Propositions 3

Note that we can write the loss as:

$$\sum_{k=1}^n \left\| \frac{1}{2} \mathbf{\Pi}'_k \mathbf{Y}' \mathbf{L}_k \mathbf{Y} \mathbf{\Pi}_k - \mathbf{\Pi}_k \mathbf{U}_k \mathbf{U}_k' \mathbf{\Pi}_k \right\|_2^2$$

Where  $\mathbf{\Pi}_k = (\mathbf{U}_k \mathbf{U}_k' + (\varepsilon_{orth})_k \mathbf{I}_s)^{-1/2}$ . We take the  $\mathbf{\Pi}_k$  matrices to be fixed and don't depend on the data points  $\mathbf{Y}$  (in practice they do, however, after taking a gradient step we update the  $\mathbf{\Pi}_k$  in an E-M style algorithm). Since  $\mathbf{U}_k \mathbf{U}_k'$  and  $\mathbf{\Pi}_k$  are the identity matrix (the latter multiplied by  $1/(1 + \varepsilon_{orth})$ ) when  $s = d$  we can compute the derivative when  $s > d$  without loss of generality.

#### 3.1 Proof of Derivative

Since the derivative is a linear operator it's sufficient to show that the derivative of a single loss function is of the form:

$$\frac{\partial l_k}{\partial \mathbf{Y}} = (2|\lambda_k^*|) \text{sgn}(\lambda_k^*) \mathbf{L}_k \mathbf{Y} \mathbf{\Pi}_k \mathbf{U}_k \mathbf{U}_k' \mathbf{\Pi}_k'$$

To compute the derivative we will make use of the chain rule. First define the function  $l_k$  as a composition of functions:

$$l_k(\mathbf{Y}) \equiv \rho(P_k(H_k(\mathbf{Y})) - \mathbf{C}_k)$$

With  $\mathbf{C}_k = \mathbf{\Pi}_k \mathbf{U}_k \mathbf{U}_k' \mathbf{\Pi}_k$  and

$$\rho(\mathbf{U}) = (\max_k |\lambda_k(\mathbf{U})|)^2$$

$$P_k(\mathbf{H}) = \mathbf{\Pi}'_k \mathbf{H} \mathbf{\Pi}_k$$

$$H_k(\mathbf{Y}) = \frac{1}{2} \mathbf{Y}' \mathbf{L}_k \mathbf{Y}$$

Where  $\mathbf{U}, \mathbf{H}$  are both symmetric. Here we note that the matrix spectral norm reduces to the spectral radius if  $\mathbf{U}$  is symmetric. Since  $H_k(\mathbf{Y})$  is defined to be symmetric and  $\mathbf{C}_k$  is symmetric this is the case. By the chain rule:

$$Dl_k(\mathbf{Y}) = D\rho(P_k(H_k(\mathbf{Y})) - \mathbf{C}_k) DP_k(H_k(\mathbf{Y})) DH_k(\mathbf{Y})$$

Taking these from left to right:

### 3.1.1 $D\rho$

Since  $\rho$  is defined to be the largest (in absolute value) eigenvalue of  $\mathbf{U}$  (squared) the derivative<sup>1</sup> is the kronecker product between the corresponding eigenvector and itself multiplied by the sign of the eigenvalue:

$$D\sqrt{\rho(\mathbf{U})} = \text{sgn}(\lambda_k^*)(\mathbf{u}'_k \otimes \mathbf{u}'_k)$$

Where  $|\lambda_k^*| = \sqrt{\rho(\mathbf{U})}$  and  $\mathbf{U}\mathbf{u}_k = \lambda_k^*\mathbf{u}_k$  Then since we square the spectral radius we add the factor of  $(2|\lambda_k^*|)$  so that:

$$D(\rho(\mathbf{U})) = (2|\lambda_k^*|)\text{sgn}(\lambda_k^*)(\mathbf{u}'_k \otimes \mathbf{u}'_k)$$

### 3.1.2 $DP_k$

$$DP_k(\mathbf{H}) = (\mathbf{\Pi}'_k \otimes \mathbf{\Pi}'_k)$$

*Proof.*

$$\begin{aligned} P_k(\mathbf{H}) &= \mathbf{\Pi}'_k \mathbf{H} \mathbf{\Pi}_k \\ dP_k(\mathbf{H}) &= \mathbf{\Pi}'_k d\mathbf{H} \mathbf{\Pi}_k \\ \Rightarrow \text{vec}(dP_k(\mathbf{H})) &= \text{vec}(\mathbf{\Pi}'_k d\mathbf{H} \mathbf{\Pi}_k) \\ &= (\mathbf{\Pi}'_k \otimes \mathbf{\Pi}'_k) d\text{vec}(\mathbf{H}) \end{aligned}$$

□

### 3.1.3 $DH_k$

$$DH_k(\mathbf{Y}) = \mathbf{N}_s(\mathbf{I}_s \otimes \mathbf{Y}'\mathbf{L}_k)$$

Where  $\mathbf{N}_s = \mathbf{I}_{s^2} + \mathbf{K}_{ss}$  for  $\mathbf{K}_{ss}$  the commutation matrix defined in Magnus & Neudecker ch. 3 §7.

*Proof.*

$$\begin{aligned} H_k(\mathbf{Y}) &= \frac{1}{2} \mathbf{Y}'\mathbf{L}_k \mathbf{Y} \\ \Rightarrow dH_k(\mathbf{Y}) &= \frac{1}{2} [(d\mathbf{Y})'\mathbf{L}_k \mathbf{Y} + \mathbf{Y}'\mathbf{L}_k d\mathbf{Y}] \\ \Rightarrow \text{vec}(dH_k(\mathbf{Y})) &= \frac{1}{2} [(\mathbf{Y}'\mathbf{L}'_k \otimes \mathbf{I}_s) d\text{vec}(\mathbf{Y}') + (\mathbf{I}_s \otimes \mathbf{Y}'\mathbf{L}_k) d\text{vec}(\mathbf{Y})] \\ &= \frac{1}{2} [(\mathbf{Y}'\mathbf{L}'_k \otimes \mathbf{I}_s) \mathbf{K}_{ns} d\text{vec}(\mathbf{Y}) + (\mathbf{I}_s \otimes \mathbf{Y}'\mathbf{L}_k) d\text{vec}(\mathbf{Y})] \\ &= \frac{1}{2} [\mathbf{K}_{ss}(\mathbf{I}_s \otimes \mathbf{Y}'\mathbf{L}'_k) d\text{vec}(\mathbf{Y}) + (\mathbf{I}_s \otimes \mathbf{Y}'\mathbf{L}_k) d\text{vec}(\mathbf{Y})] \\ &= \frac{1}{2} [(\mathbf{K}_{ss} + \mathbf{I}_{s^2})(\mathbf{I}_s \otimes \mathbf{Y}'\mathbf{L}_k) d\text{vec}(\mathbf{Y})] \quad \mathbf{L}_k \text{ is symmetric} \\ &= \frac{1}{2} [2\mathbf{N}_s(\mathbf{I}_s \otimes \mathbf{Y}'\mathbf{L}_k) d\text{vec}(\mathbf{Y})] \\ &= \mathbf{N}_s(\mathbf{I}_s \otimes \mathbf{Y}'\mathbf{L}_k) d\text{vec}(\mathbf{Y}) \end{aligned}$$

□

### 3.1.4 $Dc_k$

Putting it all together

$$Dc_k(\mathbf{Y}) = (2|\lambda_k^*|)\text{sgn}(\lambda_k^*)(\mathbf{u}'_k \otimes \mathbf{u}'_k)(\mathbf{\Pi}'_k \otimes \mathbf{\Pi}'_k)\mathbf{N}_s(\mathbf{I}_s \otimes \mathbf{Y}'\mathbf{L}_k) = \text{vec}\left(\frac{\partial c_k}{\partial \mathbf{Y}}\right)'$$

<sup>1</sup>see Matrix Differential Calculus With Applications in Statistics And Economics by Magnus & Neudecker ch. 9 §12 for proof

We can simplify this to get the claim:

$$\frac{\partial c_k}{\partial Y} = (2|\lambda_k^*|)\text{sgn}(\lambda_k^*)\mathbf{L}_k\mathbf{Y}\mathbf{\Pi}_k\mathbf{u}_k\mathbf{u}_k'\mathbf{\Pi}_k'$$

*Proof.*

$$\begin{aligned} Dc_k(\mathbf{Y}) &= (2|\lambda_k^*|)\text{sgn}(\lambda_k^*)(\mathbf{u}_k' \otimes \mathbf{u}_k')(\mathbf{\Pi}_k' \otimes \mathbf{\Pi}_k')\mathbf{N}_s(\mathbf{I}_s \otimes \mathbf{Y}'\mathbf{L}_k) \\ &= (2|\lambda_k^*|)\text{sgn}(\lambda_k^*)(\mathbf{u}_k' \otimes \mathbf{u}_k')(\mathbf{\Pi}_k' \otimes \mathbf{\Pi}_k')\frac{1}{2}(\mathbf{K}_{ss} + \mathbf{I}_{s^2})(\mathbf{I}_s \otimes \mathbf{Y}'\mathbf{L}_k) \\ &= (2|\lambda_k^*|)\text{sgn}(\lambda_k^*)\frac{1}{2}(\mathbf{u}_k'\mathbf{\Pi}_k' \otimes \mathbf{u}_k'\mathbf{\Pi}_k')(\mathbf{K}_{ss} + \mathbf{I}_{s^2})(\mathbf{I}_s \otimes \mathbf{Y}'\mathbf{L}_k) \\ &= (2|\lambda_k^*|)\text{sgn}(\lambda_k^*)\frac{1}{2}[(\mathbf{u}_k'\mathbf{\Pi}_k' \otimes \mathbf{u}_k'\mathbf{\Pi}_k')\mathbf{K}_{ss}(\mathbf{I}_s \otimes \mathbf{Y}'\mathbf{L}_k) + (\mathbf{u}_k'\mathbf{\Pi}_k' \otimes \mathbf{u}_k'\mathbf{\Pi}_k')(\mathbf{I}_s \otimes \mathbf{Y}'\mathbf{L}_k)] \\ &= (2|\lambda_k^*|)\text{sgn}(\lambda_k^*)\frac{1}{2}[(\mathbf{u}_k'\mathbf{\Pi}_k' \otimes \mathbf{u}_k'\mathbf{\Pi}_k')(\mathbf{Y}'\mathbf{L}_k \otimes \mathbf{I}_s)\mathbf{K}_{ns} + (\mathbf{u}_k'\mathbf{\Pi}_k' \otimes \mathbf{u}_k'\mathbf{\Pi}_k')(\mathbf{I}_s \otimes \mathbf{Y}'\mathbf{L}_k)] \\ &= (2|\lambda_k^*|)\text{sgn}(\lambda_k^*)\frac{1}{2}[(\mathbf{u}_k'\mathbf{\Pi}_k'\mathbf{Y}'\mathbf{L}_k \otimes \mathbf{u}_k'\mathbf{\Pi}_k')\mathbf{K}_{ns} + (\mathbf{u}_k'\mathbf{\Pi}_k' \otimes \mathbf{u}_k'\mathbf{\Pi}_k'\mathbf{Y}'\mathbf{L}_k)] \\ &= (2|\lambda_k^*|)\text{sgn}(\lambda_k^*)\frac{1}{2}[\mathbf{K}_{11}(\mathbf{u}_k'\mathbf{\Pi}_k' \otimes \mathbf{u}_k'\mathbf{\Pi}_k'\mathbf{Y}'\mathbf{L}_k) + (\mathbf{u}_k'\mathbf{\Pi}_k' \otimes \mathbf{u}_k'\mathbf{\Pi}_k'\mathbf{Y}'\mathbf{L}_k)] \\ &= (2|\lambda_k^*|)\text{sgn}(\lambda_k^*)(\mathbf{u}_k'\mathbf{\Pi}_k' \otimes \mathbf{u}_k'\mathbf{\Pi}_k'\mathbf{Y}'\mathbf{L}_k) \quad \mathbf{K}_{11} = 1 \\ &= (2|\lambda_k^*|)\text{sgn}(\lambda_k^*)(\mathbf{\Pi}_k\mathbf{u}_k \otimes \mathbf{L}_k\mathbf{Y}\mathbf{\Pi}_k\mathbf{u}_k)' \end{aligned}$$

Then note that:

$$\begin{aligned} \text{vec}((2|\lambda_k^*|)\text{sgn}(\lambda_k^*)\mathbf{L}_k\mathbf{Y}\mathbf{\Pi}_k\mathbf{u}_k\mathbf{u}_k'\mathbf{\Pi}_k') &= (2|\lambda_k^*|)\text{sgn}(\lambda_k^*)\text{vec}([\mathbf{L}_k\mathbf{Y}\mathbf{\Pi}_k\mathbf{u}_k][1][\mathbf{u}_k'\mathbf{\Pi}_k']) \\ &= (2|\lambda_k^*|)\text{sgn}(\lambda_k^*)(\mathbf{\Pi}_k\mathbf{u}_k \otimes \mathbf{L}_k\mathbf{Y}\mathbf{\Pi}_k\mathbf{u}_k)\text{vec}(1) \\ &= (2|\lambda_k^*|)\text{sgn}(\lambda_k^*)(\mathbf{\Pi}_k\mathbf{u}_k \otimes \mathbf{L}_k\mathbf{Y}\mathbf{\Pi}_k\mathbf{u}_k) \\ &= (Dc_k(\mathbf{Y}))' \end{aligned}$$

So that

$$\frac{\partial c_k}{\partial Y} = (2|\lambda_k^*|)\text{sgn}(\lambda_k^*)\mathbf{L}_k\mathbf{Y}\mathbf{\Pi}_k\mathbf{u}_k\mathbf{u}_k'\mathbf{\Pi}_k'$$

The proposition then follows by removing the absolute value and multiplication by the sign.  $\square$

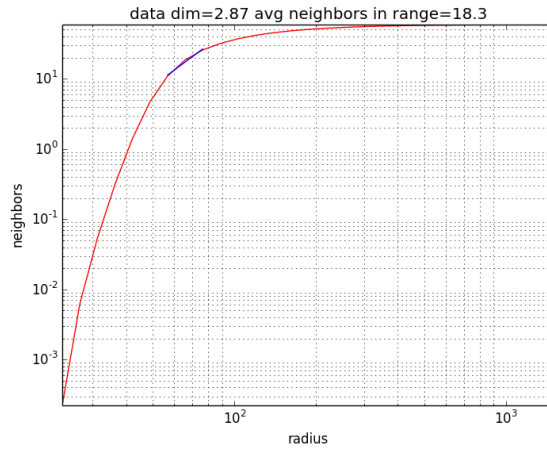

Figure 1: The average number of neighbors  $m(r)$  vs the neighborhood radius  $r$ , on a log-log scale, for the SDSS spectra data, computed on the whole sample of 675,000 galaxies. The blue regression line, is fitted to the graph points in the shown  $r$  range, and has slope 2.87. The absence of a linear region on this graph suggests that the data dimension varies with the scale. The analysis and visualization in this paper corresponds to the largest meaningful scale.
